# Supplementary material
Source: ML conference proceedings conference paper supplement (https://openaccess.thecvf.com/content/ICCV2021/html/Zhang_Neural_Video_Portrait_ICCV_2021_paper.html)
Supplement: Supplementary file 2 [file Zhang_Neural_Video_Portrait_ICCV_2021_supplemental.zip]

Archive with 3 entries (2 files):
- 02424_supp/
- 02424_supp/supplementary.mp4
- 02424_supp/supplementary.pdf
